# Supplementary material for: Potentially cytotoxic new copper(ii) hydrazone complexes: synthesis, crystal structure and biological properties
Source: Royal Society of Chemistry journal article supplement (doi:10.1039/c3dt50371b), 2013-01-01
Supplement: c3dt50371b.pdf [file c3dt50371b.pdf]

# Supporting Information

## Potentially cytotoxic new copper(II)hydrazone complexes: Synthesis, crystal structure and biological properties

Mani Alagesan<sup>a</sup>, Nattamai S.P.Bhuvanesh<sup>b</sup> and NallasamyDharmaraj<sup>a,\*</sup>

<sup>a</sup>*Inorganic and Nanomaterials Research Laboratory, Department of Chemistry, Bharathiar  
University, Coimbatore – 641 046, India*

<sup>b</sup>*Department of Chemistry, Texas A&M University, College Station, TX 77843, U.S.A.*

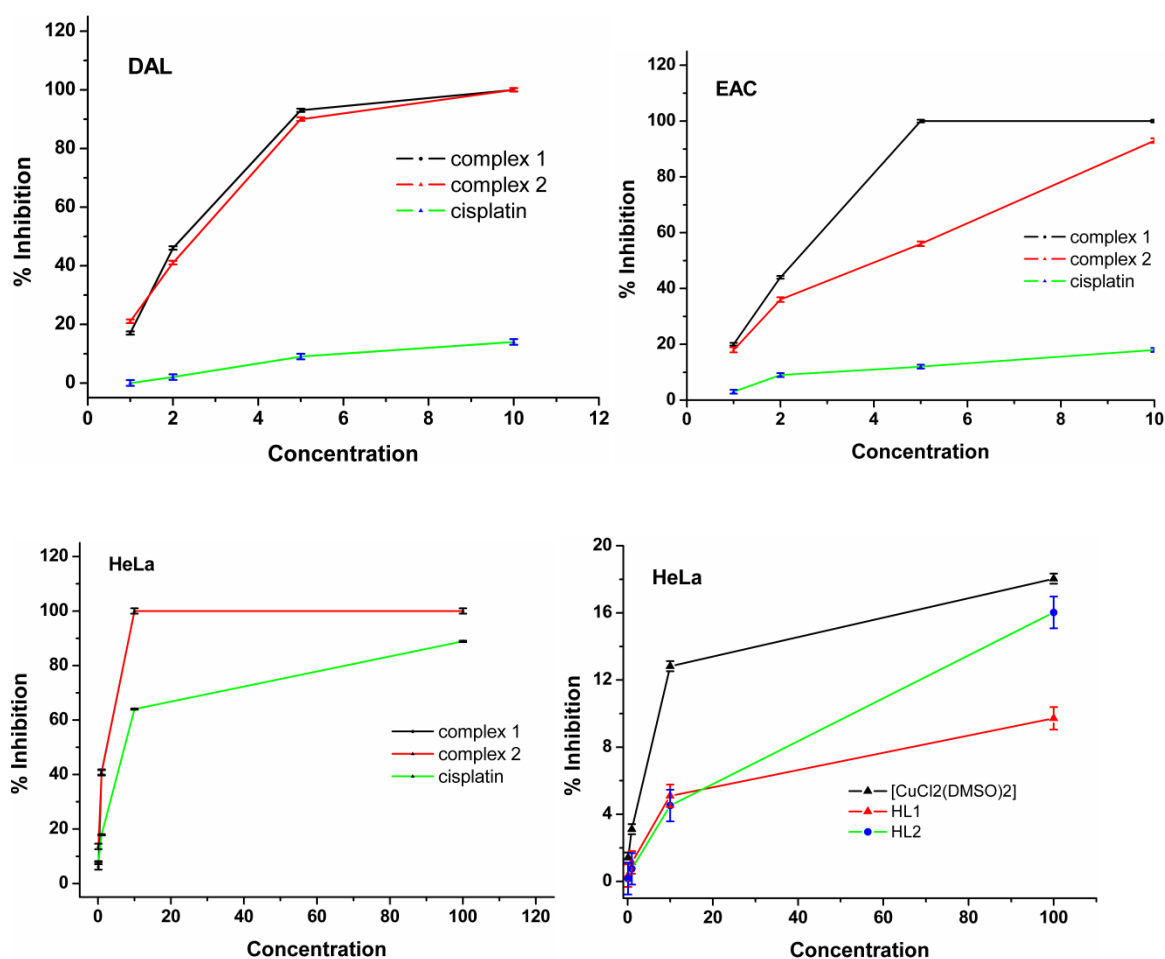

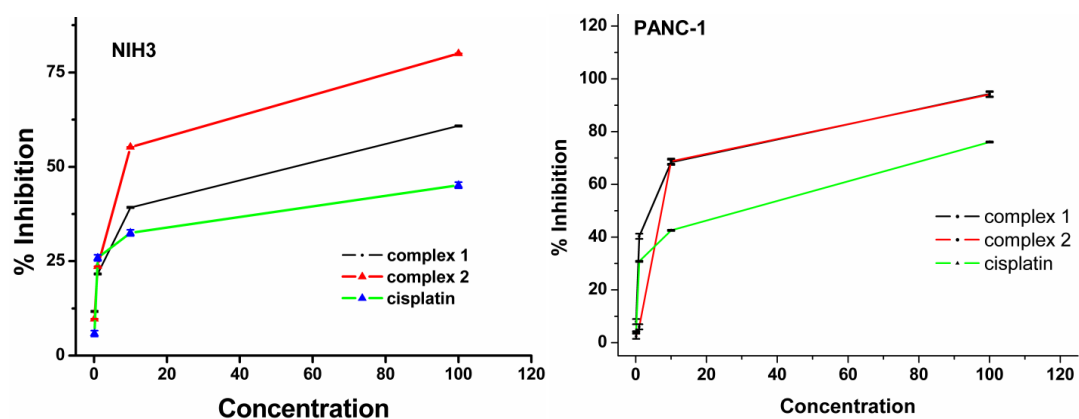

Figure S1. Cytotoxicity assessed by Trypan blue (EAC and DAL) and MTT(HeLa, PANC-1 and NIH 3T3) method respectively upon the increasing concentration of complexes.
